# Supplementary material for: Electrically and thermally stable gate dielectrics from thiol–ene cross-linked systems for use in organic thin-film transistors
Source: Royal Society of Chemistry journal article supplement (doi:10.1039/c3tc30297k), 2013-01-01
Supplement: c3tc30297k.pdf [file c3tc30297k.pdf]

## Supplementary Information

# Electrically and Thermally Stable Gate Dielectrics from Thiol-Ene Cross-Linked Systems for Use in Organic Thin-Film Transistors

Jung Min Ko, Young Hun Kang, Changjin Lee,\* and Song Yun Cho\*

### *Additional Figures*

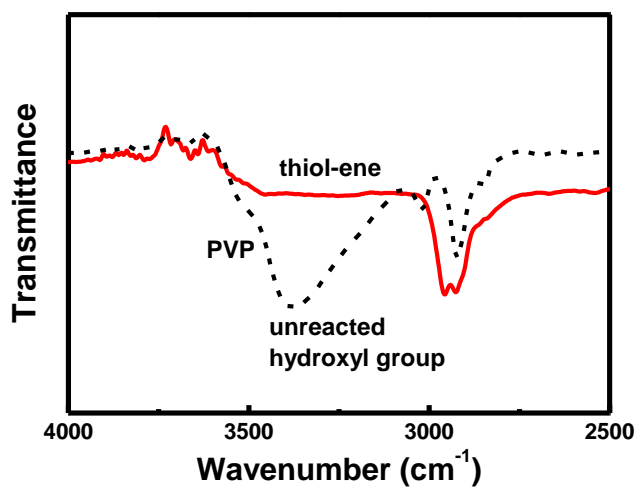

**Figure S1.** FT-IR spectra of the thiol-ene and PVP films.

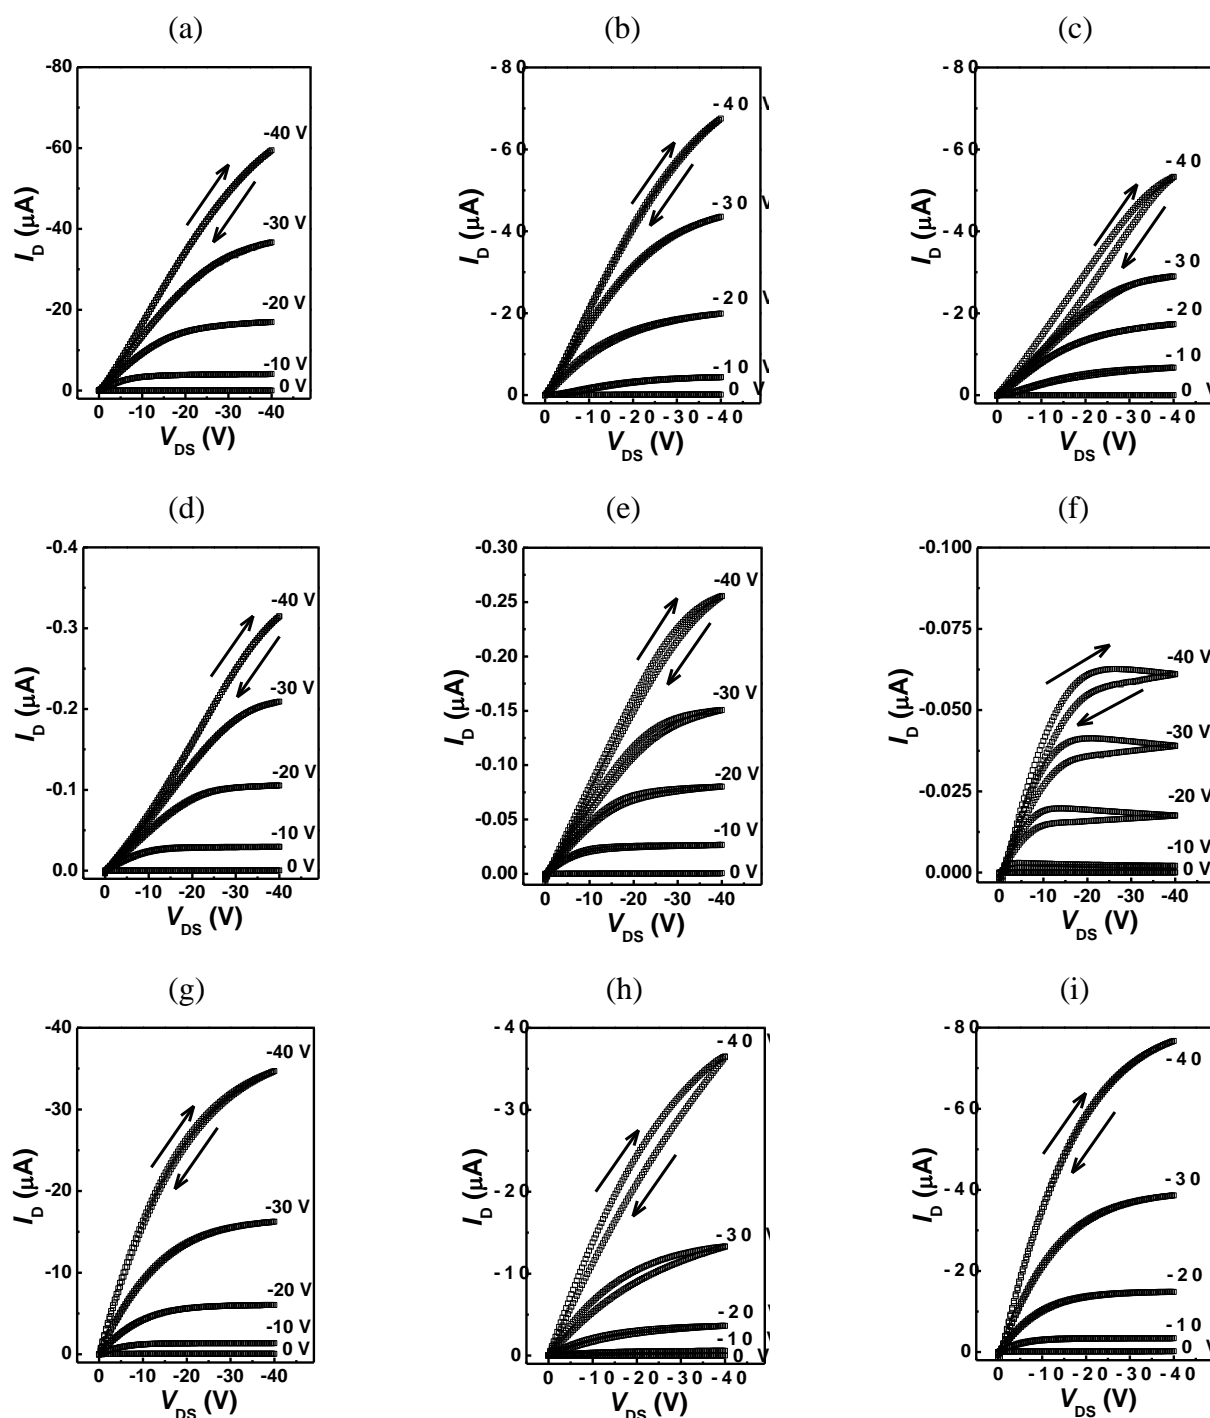

**Figure S2.** The output characteristics of OTFTs by inkjet printing of a mixture of TIPS pentacene and APC on (a) thiol-ene, (b) PVP, and (c) SiO<sub>2</sub>, by spin coating of TIPS pentacene on (d) thiol-ene, (e) PVP, and (f) SiO<sub>2</sub>, and by thermal evaporation of pentacene on (g) thiol-ene, (h) PVP, and (i) SiO<sub>2</sub>.

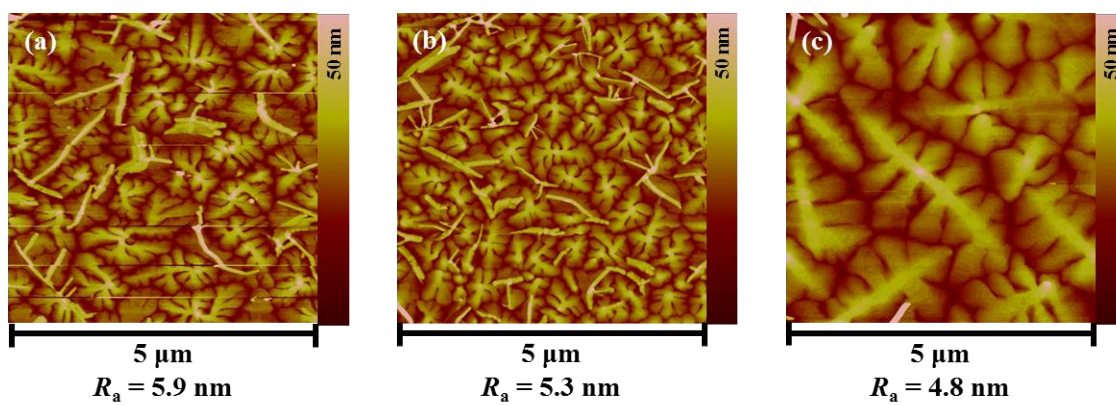

**Figure S3.** AFM images of deposited pentacene crystals on (a) thiol-ene, (b) PVP, and (c)  $\text{SiO}_2$ .
